# Supplementary figures and images for: Amorphous NiB as an electrocatalyst: from KA oil to succinic acid
Source: Royal Society of Chemistry journal article supplement (doi:10.1039/d5cp03623b), 2026-01-01

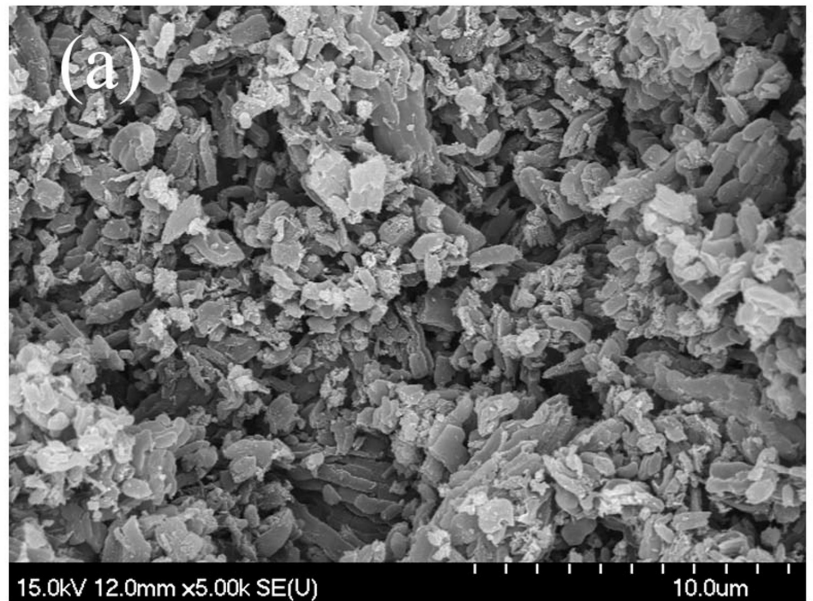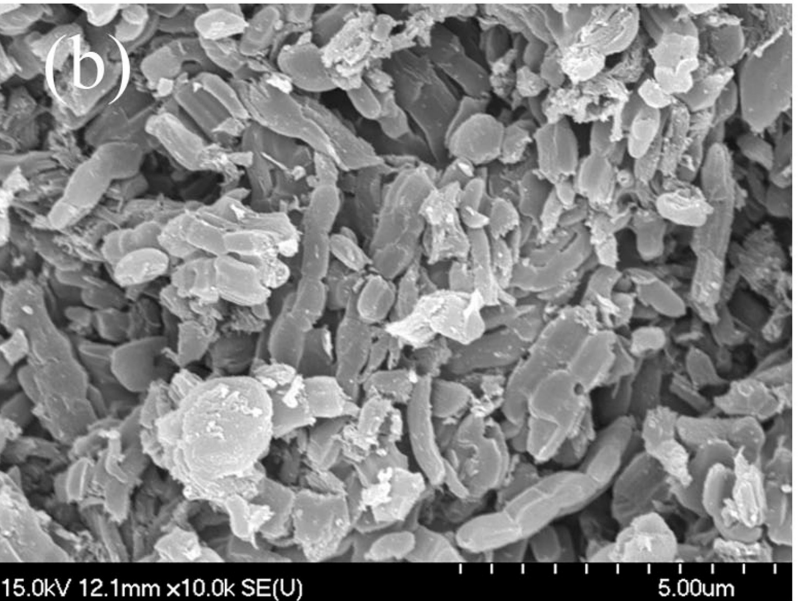

Supplement: d5cp03623b1.pdf [file d5cp03623b1.pdf]

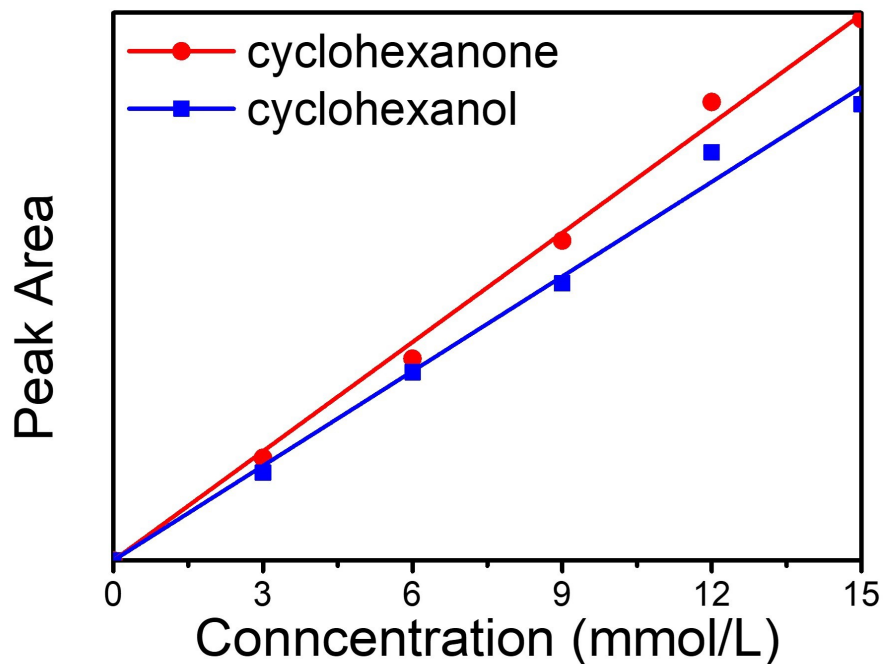

Supplement: d5cp03623b2.pdf [file d5cp03623b2.pdf]

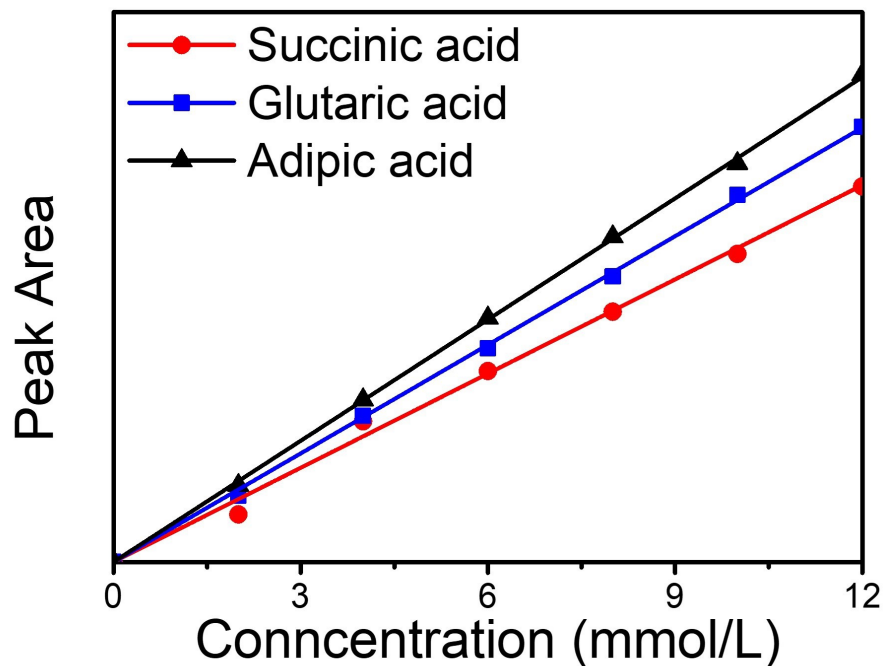

Supplement: d5cp03623b3.pdf [file d5cp03623b3.pdf]

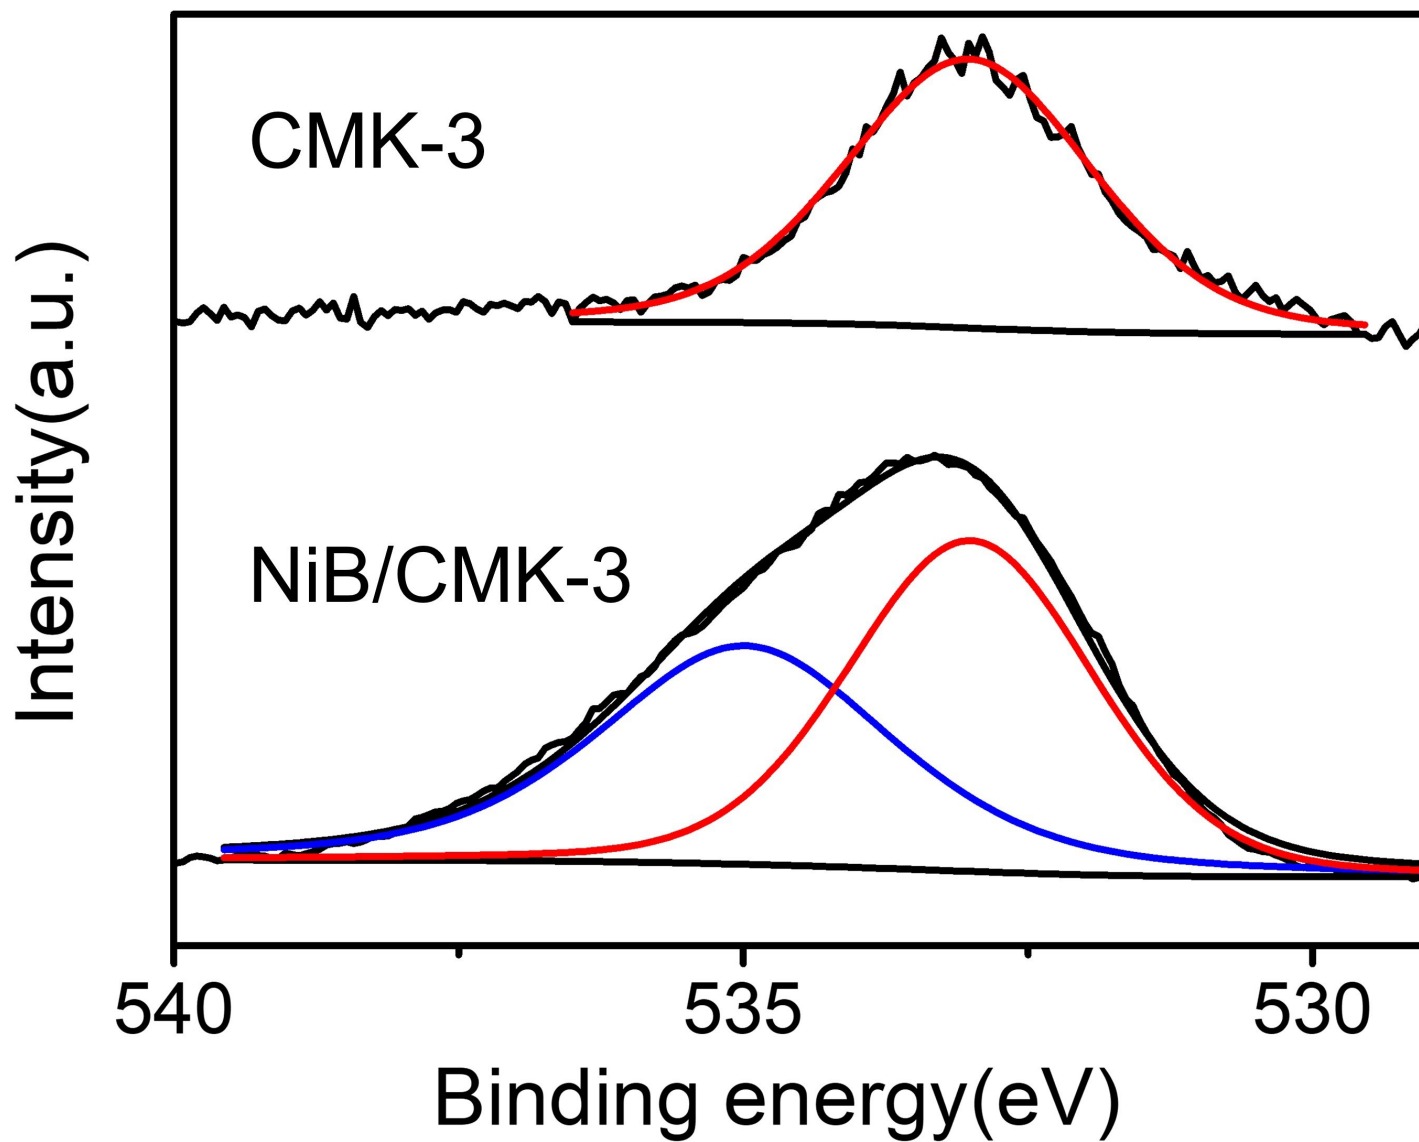

Supplement: d5cp03623b4.pdf [file d5cp03623b4.pdf]

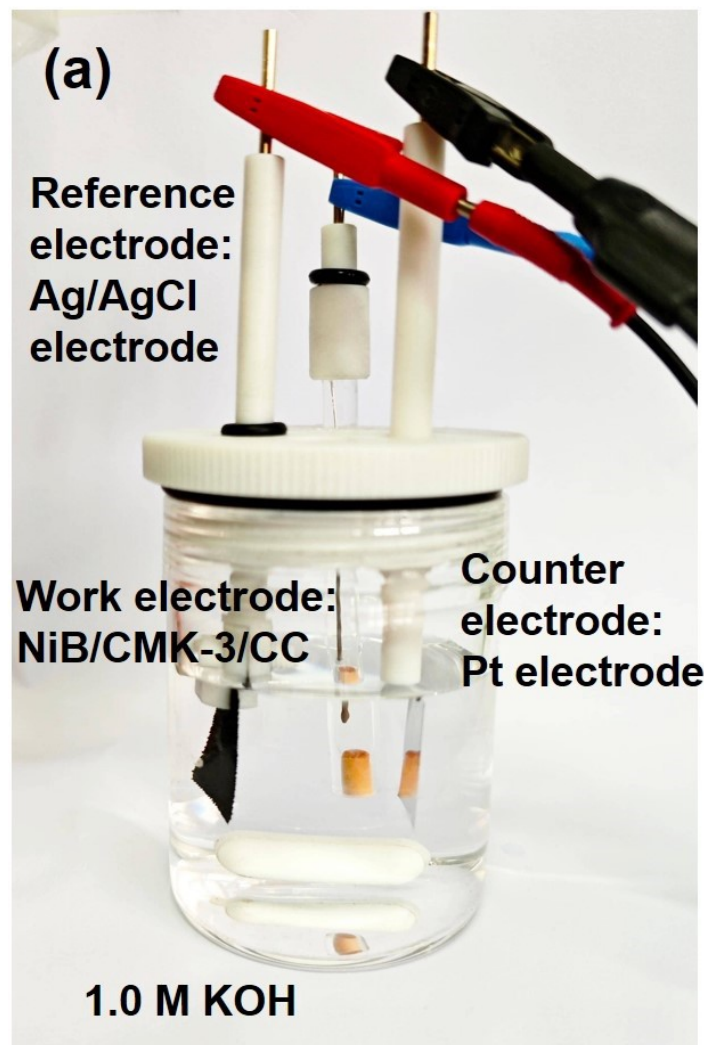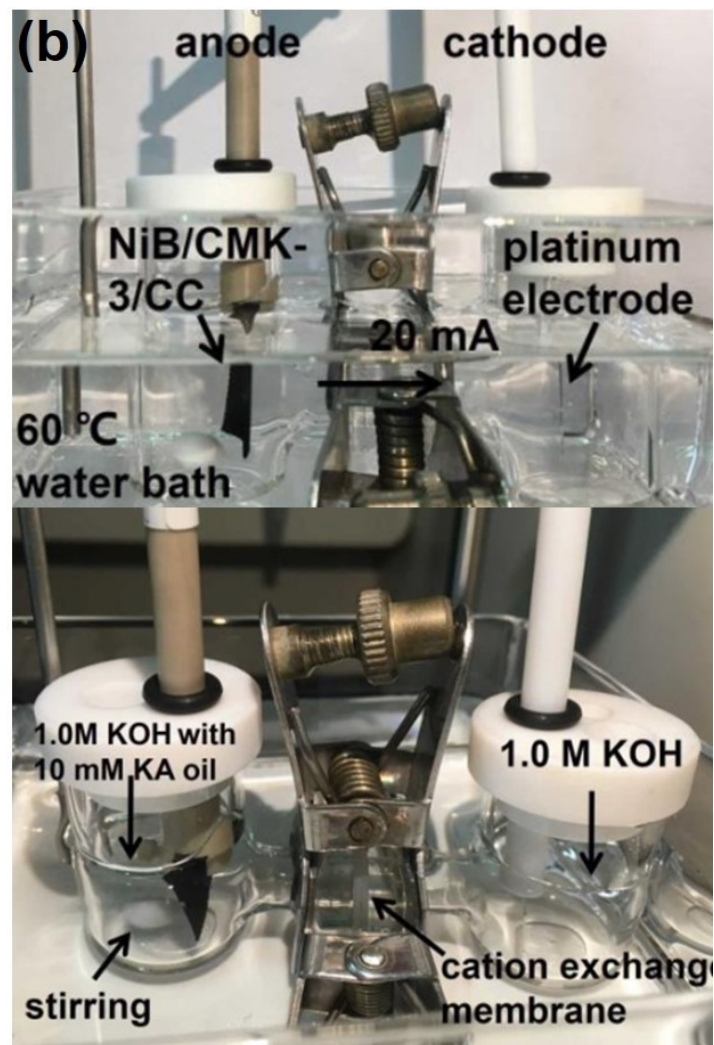

Supplement: d5cp03623b6.pdf [file d5cp03623b6.pdf]
